# Supplementary material for: Floral resource maps: a tool to explain flower-visiting insect abundance at multiple spatial scales
Source: Springer Nature journal article supplement (doi:10.1007/s10980-023-01643-9), 2023-03-28

## Appendix A Protocol details and references of projects used for exhaustive vegetation data

| Land-cover type | Year      | Project          | Total species richness | No. species 'filtered' <sup>1</sup> | Protocol details                                                                                                          | References              |
|-----------------|-----------|------------------|------------------------|-------------------------------------|---------------------------------------------------------------------------------------------------------------------------|-------------------------|
| Grassland       | 2018      | SEBIOPAG         | 108                    | 51                                  | Quadrats located 5 m apart, 50 m away from the field margin                                                               | Ricci et al. (2019)     |
|                 | 2018      | BISCO            |                        |                                     | Quadrats evenly distributed, at least 5 m away from the field margin                                                      | Uroy (2020)             |
| Winter cereal   | 2019      | AGRIM            | 112                    | 95                                  | Quadrats evenly distributed, at least 10 m away from the field margin                                                     | Ricono (2021)           |
|                 | 2018      | SEBIOPAG         |                        |                                     | Quadrats located 5 m apart, 50 m away from the field margin                                                               | Ricci et al. (2019)     |
| Maize           | 2013-2014 | FARMLAND         | 96                     | 45                                  | Quadrats located along two transects, one at 1 m away from the field margin, the other at 25 m away from the field margin | Alignier et al. (2020)  |
|                 | 2018      | SEBIOPAG         |                        |                                     | Quadrats located 5 m apart, 50 m away from the field margin                                                               | Ricci et al. (2019)     |
| Woodland        | 2018      | BISCO            | 146                    | 36                                  | Quadrats evenly distributed, at least 5 m away from the field margin                                                      | Uroy (2020)             |
| Legume-cereal   | 2018      | DIVAG            | 124                    | 63                                  | Quadrats located 5 m apart, 25 m away from the field margin                                                               | Aviron et al. (in prep) |
|                 | 2019      | AGRIM            |                        |                                     | Quadrats evenly distributed, at least 10 m away from the field margin                                                     | Ricono (2021)           |
|                 | 2018      | Berry internship |                        |                                     | Quadrats located 5 m apart, 25 m away from the field margin                                                               | Aviron et al. (2023)    |
| Hedgerow        | 2019      | AGRIM            | 193                    | 76                                  | Quadrats located 5 m apart                                                                                                | Ricono (2021)           |

<sup>1</sup> Number of species among the 95 dicotyledon species 'filtered'. See Appendix B for details about species selection.

Alignier A, Solé-Senan X, Robleño I, Baraibar B, Fahrig L, Giralt D, Gross N, Martin, J-L, Recasens, J, Sirami C, Siriwardena G, Baillod A, Bertrand C, Carrié R, Hass A, Henckel L., Miguet P, Badenhausser I, Baudry J, Bota G, Bretagnolle V, Brotons L, Burel F, Calatayud F, Clough Y, Georges R, Gibon A, Girard J, Lindsay K, Minano J, Mitchell S, Patry N, Poulin B, Tscharrntke T, Vialatte A, Violle C, Yaverkovski N., Batáry P (2020) Configurational crop heterogeneity increases within-field plant diversity. *Journal of Applied Ecology* 57(4): 654-663

Aviron S, Berry T, Leroy D, Savary G, Alignier A (2023) Wild plants in hedgerows and weeds in crop fields are important floral resources for wild flower-visiting insects, independently of the presence of intercrops. *Agriculture, Ecosystems and Environment*, in press.

Aviron S, Berry T, Jeavons E, Le Lann C, Leroy D, van Baaren J, Alignier A (in prep) Contribution of floral resources provided by crops, weeds and wild plants in supporting wild pollinating insects in agricultural landscapes

Ricci B, Lavigne C, Alignier A, Aviron S, Biju-Duval L, Bouvier JC, Choisis JP, Franck P, Joannon A, Ladet S, Mezerette F, Plantegenest M, Savary G, Vialatte A, Petit S (2019) Local pesticide use intensity conditions landscape effects on biological pest control. *Proceedings of the Royal Society B* 286(1904) : 20182898

Ricono C (2021) Effets des pratiques agricoles biologiques en contexte bocager sur le microbiote du blé et ses fonctions associées. PhD Dissertation, University of Rennes

Uroy L (2020) Effet de la connectivité et de sa dynamique temporelle sur la structuration taxonomique et fonctionnelle des communautés végétales. PhD Dissertation, University of Rennes

**Appendix B** Flowchart of the successive steps used to obtain Community Weighted Mean (CWM) values of each floral trait per landscape

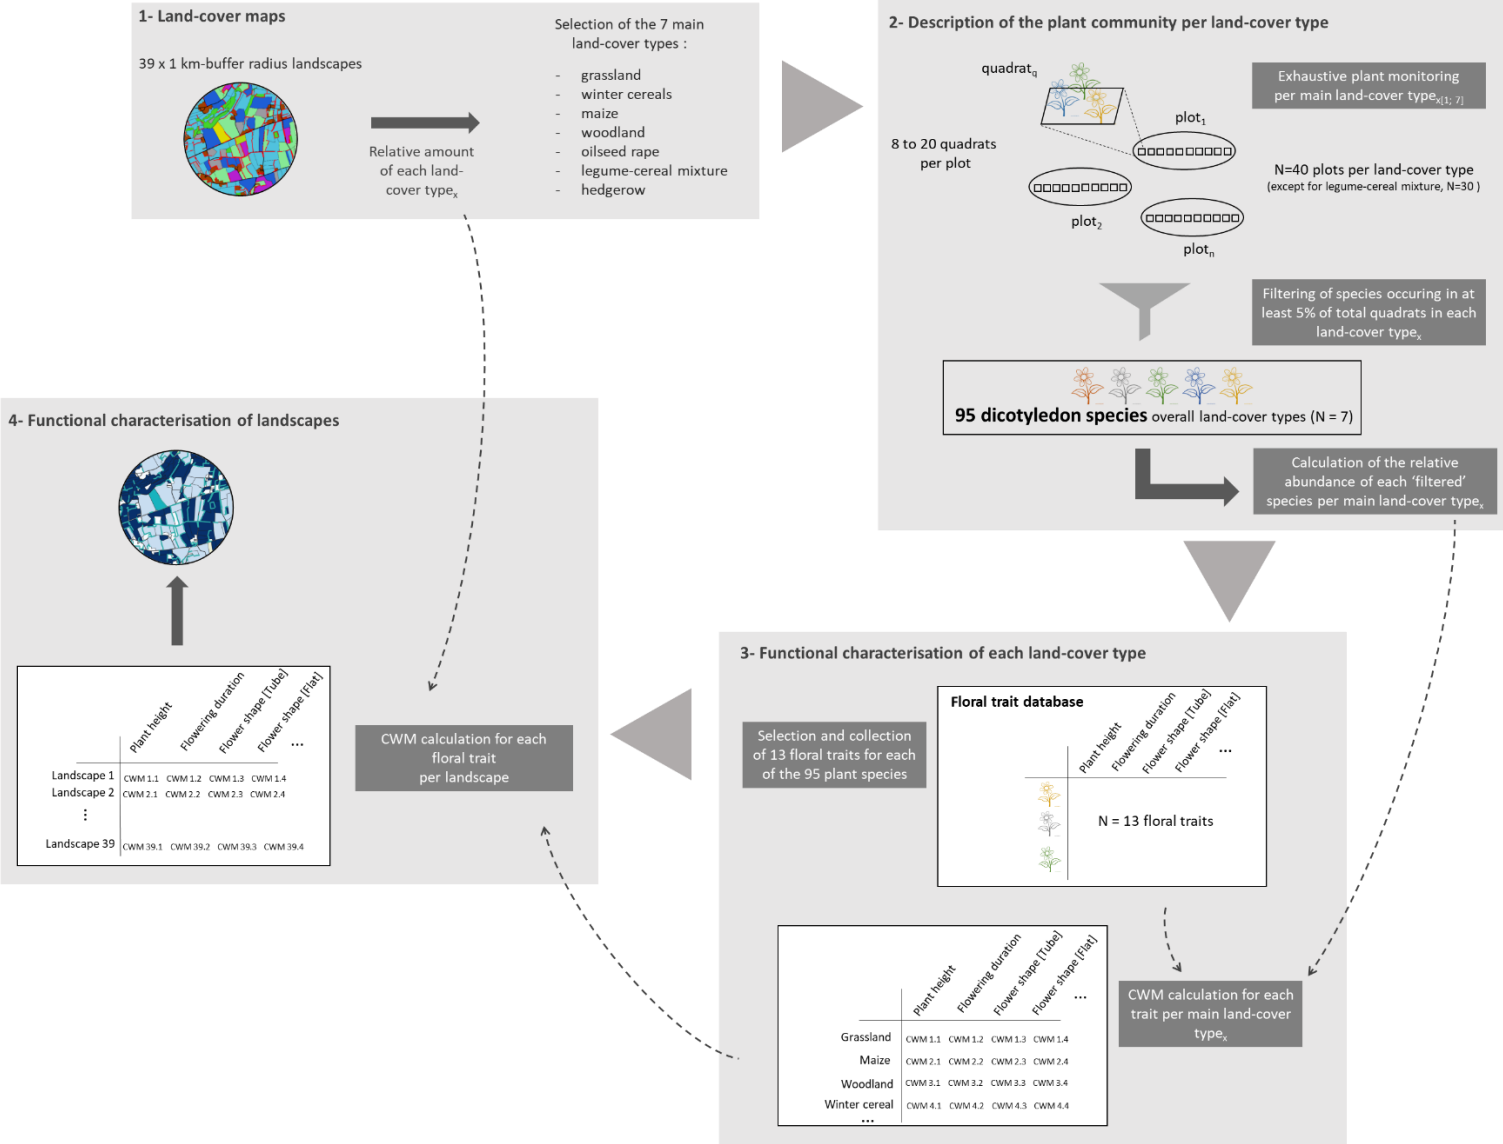

**Appendix C** Species accumulation curves for main land-cover types

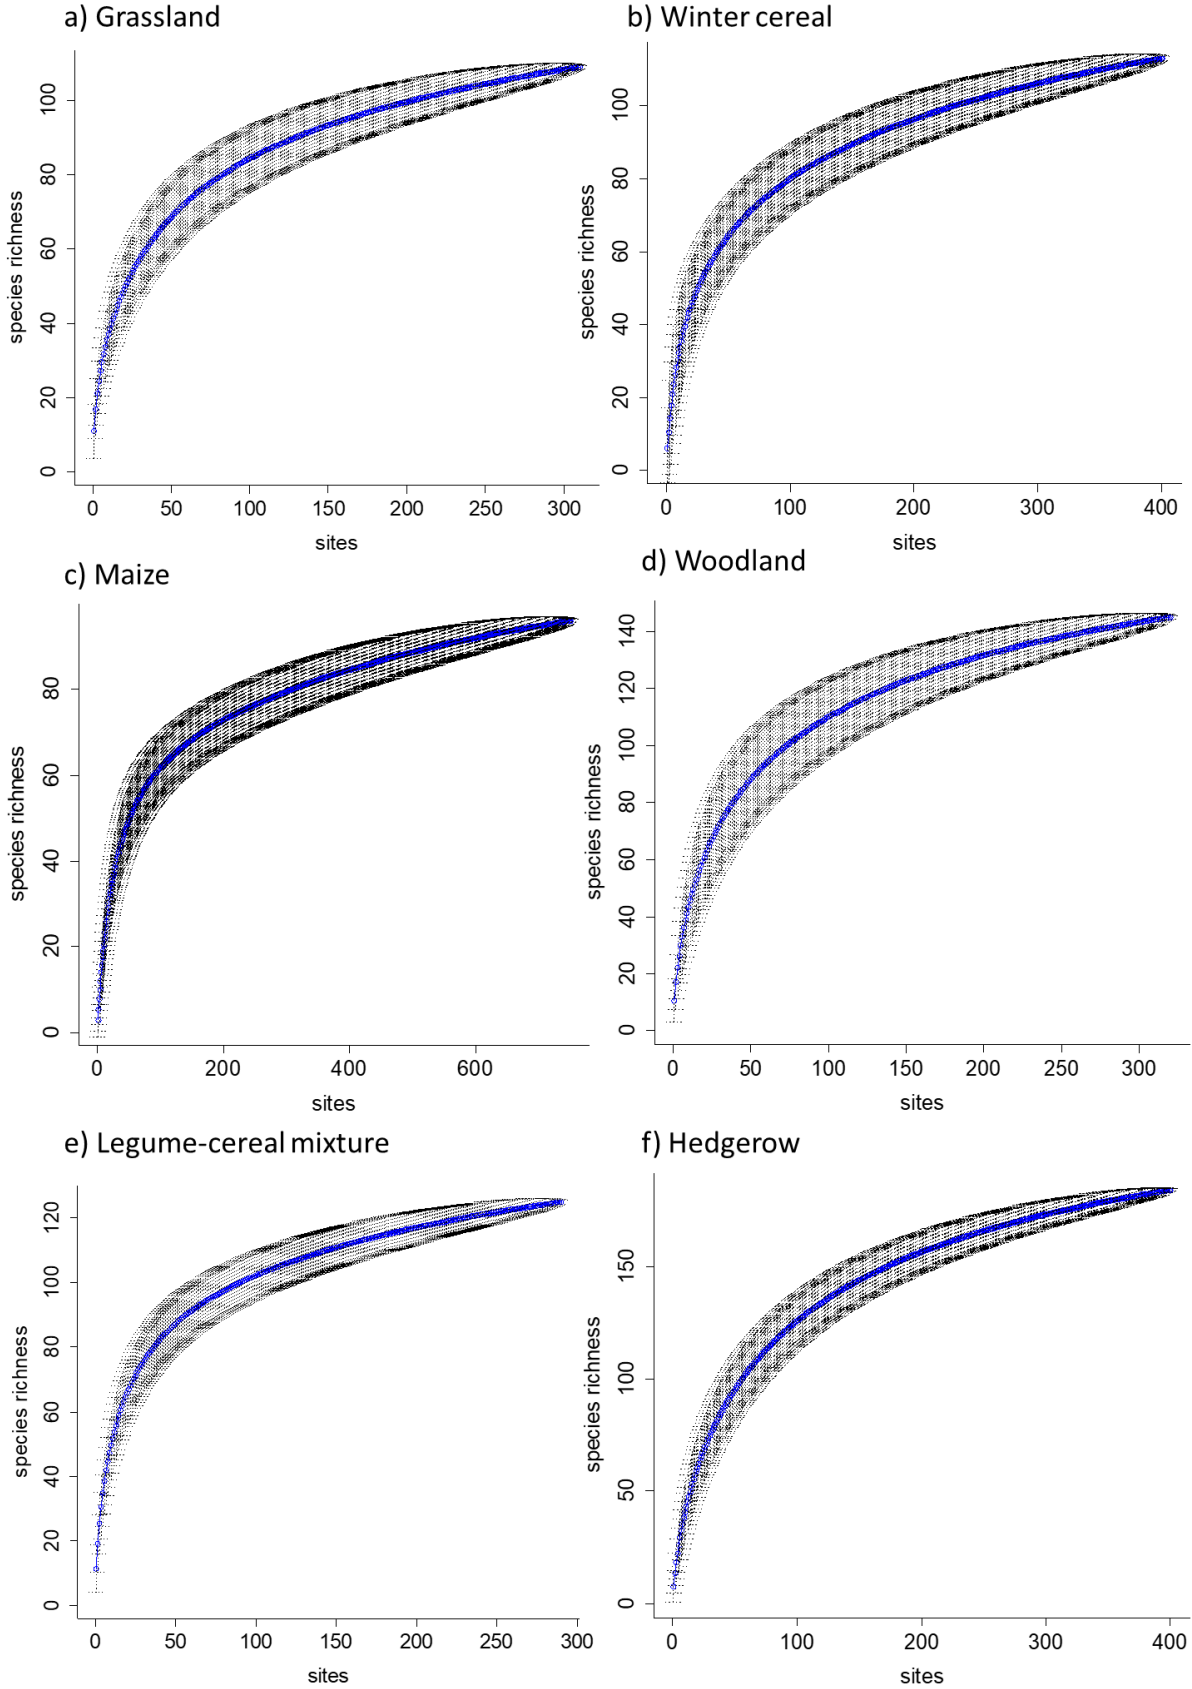

**Appendix D** Illustration of the three traits modalities for *Flower morphology*

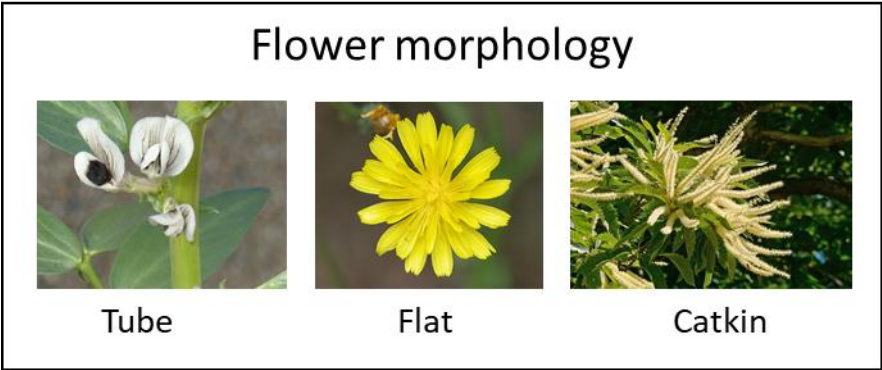

**Appendix E** Community Weighted Mean (CWM) values of each floral trait for each main land-cover type.

|                 | Mean UV<br>reflexion | Min size<br>of floral<br>unit | Max size<br>of floral<br>unit | Plant<br>height<br>[Short] | Plant height<br>[Intermediate] | Plant<br>height<br>[Tall] | Flowering<br>duration | Flower<br>symmetry<br>[Actino.] | Flower<br>symmetry<br>[Zygo.] | Flower<br>morpho.<br>[Catkin] | Flower<br>morpho.<br>[Flat] | Flower<br>morpho.<br>[Tube] | Empiric<br>nectar<br>productivity |
|-----------------|----------------------|-------------------------------|-------------------------------|----------------------------|--------------------------------|---------------------------|-----------------------|---------------------------------|-------------------------------|-------------------------------|-----------------------------|-----------------------------|-----------------------------------|
| Grassland       | 9.20                 | 17.35                         | 28.02                         | 0.76                       | 0.24                           | 0.00                      | 6.26                  | 0.63                            | 0.37                          | 0.00                          | 0.56                        | 0.37                        | 466.68                            |
| Woodland        | 10.93                | 24.30                         | 41.45                         | 0.50                       | 0.32                           | 0.18                      | 3.85                  | 0.71                            | 0.09                          | 0.21                          | 0.72                        | 0.07                        | 405.85                            |
| Maize           | 13.40                | 14.28                         | 23.77                         | 0.90                       | 0.10                           | 0.00                      | 6.66                  | 0.77                            | 0.23                          | 0.00                          | 0.79                        | 0.20                        | 67.16                             |
| Legume-crop mix | 14.11                | 14.31                         | 24.04                         | 0.52                       | 0.48                           | 0.00                      | 4.61                  | 0.42                            | 0.58                          | 0.00                          | 0.43                        | 0.57                        | 138.00                            |
| Winter cereals  | 14.40                | 11.06                         | 18.74                         | 0.86                       | 0.14                           | 0.00                      | 6.54                  | 0.69                            | 0.31                          | 0.00                          | 0.76                        | 0.23                        | 170.46                            |
| Hedgerow        | 12.31                | 14.74                         | 27.69                         | 0.23                       | 0.62                           | 0.15                      | 4.18                  | 0.75                            | 0.11                          | 0.18                          | 0.71                        | 0.11                        | 199.79                            |
| Oilseed rape    | 21.50                | 20.00                         | 30.00                         | 0.00                       | 1.00                           | 0.00                      | 5.00                  | 1.00                            | 0.00                          | 0.00                          | 1.00                        | 0.00                        | 268.11                            |

**Appendix F** Spearman correlation coefficients between Community Weighted Mean (CWM) values of each floral trait, at the field scale. Bold values indicate Spearman *rho* coefficients > |0.7|

|                             | Mean UV reflection | Min size of floral unit | Max size of floral unit | Plant height [Intermediate] | Plant height [Short] | Plant height [Tall] | Flowering duration | Flower symmetry [Actino.] | Flower symmetry [Zygo.] | Empiric nectar productivity | Flower morpho. [Catkin] | Flower morpho. [Flat] | Flower morpho. [Tube] |
|-----------------------------|--------------------|-------------------------|-------------------------|-----------------------------|----------------------|---------------------|--------------------|---------------------------|-------------------------|-----------------------------|-------------------------|-----------------------|-----------------------|
| Mean UV reflection          | <b>1.00</b>        | 0.16                    | 0.17                    | 0.04                        | -0.04                | -0.16               | 0.10               | 0.25                      | -0.25                   | -0.40                       | -0.05                   | 0.18                  | -0.18                 |
| Min size of floral unit     | 0.16               | <b>1.00</b>             | <b>0.96</b>             | 0.37                        | -0.37                | 0.11                | -0.08              | -0.01                     | 0.00                    | 0.15                        | 0.27                    | -0.04                 | 0.02                  |
| Max size of floral unit     | 0.17               | <b>0.96</b>             | <b>1.00</b>             | 0.45                        | -0.46                | 0.02                | -0.24              | -0.13                     | 0.12                    | 0.08                        | 0.20                    | -0.19                 | 0.17                  |
| Plant height [Intermediate] | 0.04               | 0.37                    | 0.45                    | <b>1.00</b>                 | <b>-1.00</b>         | -0.26               | -0.66              | <b>-0.71</b>              | <b>0.70</b>             | 0.01                        | -0.09                   | -0.67                 | 0.66                  |
| Plant height [Short]        | -0.04              | -0.37                   | -0.46                   | <b>-1.00</b>                | <b>1.00</b>          | 0.24                | 0.66               | <b>0.70</b>               | <b>-0.70</b>            | -0.01                       | 0.09                    | 0.66                  | -0.66                 |
| Plant height [Tall]         | -0.16              | 0.11                    | 0.02                    | -0.26                       | 0.24                 | <b>1.00</b>         | 0.41               | 0.32                      | -0.33                   | 0.30                        | 0.79                    | 0.44                  | -0.44                 |
| Flowering duration          | 0.10               | -0.08                   | -0.24                   | -0.66                       | 0.66                 | 0.41                | <b>1.00</b>        | 0.75                      | <b>-0.76</b>            | 0.31                        | 0.33                    | <b>0.81</b>           | <b>-0.81</b>          |
| Flower symmetry [Actino.]   | 0.25               | -0.01                   | -0.13                   | <b>-0.71</b>                | <b>0.70</b>          | 0.32                | <b>0.75</b>        | <b>1.00</b>               | <b>-1.00</b>            | 0.13                        | 0.26                    | <b>0.92</b>           | <b>-0.93</b>          |
| Flower symmetry [Zygo.]     | -0.25              | 0.00                    | 0.12                    | <b>0.70</b>                 | <b>-0.70</b>         | -0.33               | <b>-0.76</b>       | <b>-1.00</b>              | <b>1.00</b>             | -0.14                       | -0.27                   | <b>-0.93</b>          | <b>0.93</b>           |
| Empiric nectar productivity | -0.40              | 0.15                    | 0.08                    | 0.01                        | -0.01                | 0.30                | 0.31               | 0.13                      | -0.14                   | <b>1.00</b>                 | 0.25                    | 0.25                  | -0.24                 |
| Flower morpho. [Catkin]     | -0.05              | 0.27                    | 0.20                    | -0.09                       | 0.09                 | <b>0.79</b>         | 0.33               | 0.26                      | -0.27                   | 0.25                        | <b>1.00</b>             | 0.34                  | -0.35                 |
| Flower morpho. [Flat]       | 0.18               | -0.04                   | -0.19                   | -0.67                       | 0.66                 | 0.44                | 0.81               | <b>0.92</b>               | <b>-0.93</b>            | 0.25                        | 0.34                    | <b>1.00</b>           | <b>-1.00</b>          |
| Flower morpho. [Tube]       | -0.18              | 0.02                    | 0.17                    | 0.66                        | -0.66                | -0.44               | <b>-0.81</b>       | <b>-0.93</b>              | <b>0.93</b>             | -0.24                       | -0.35                   | <b>-1.00</b>          | <b>1.00</b>           |

**Appendix G** Spearman correlation coefficients between Community Weighted Mean (CWM) values of each floral trait, at the landscape scale (i.e. 250, 500 and 1000 m). Bold values indicate Spearman  $\rho$  coefficients  $> |0.7|$

*See attached excel file*

**Appendix H** Spatial correlograms (plotting Moran's I values against distance in metres) of Generalized Linear Models residuals for each flower-visiting insect group. The 95 % confidence intervals (in grey) always encompass the zero-value, indicating the absence of spatial autocorrelation.



a) Wild bees < 1cm

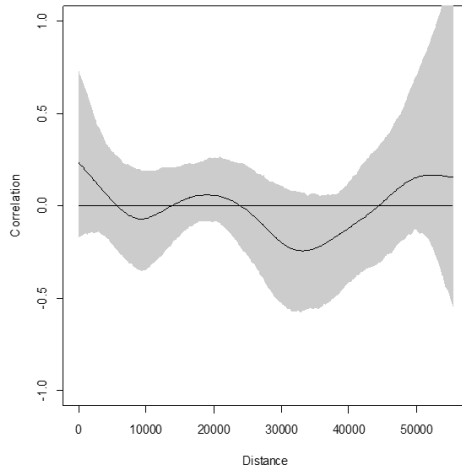

b) Wild bees > 1cm

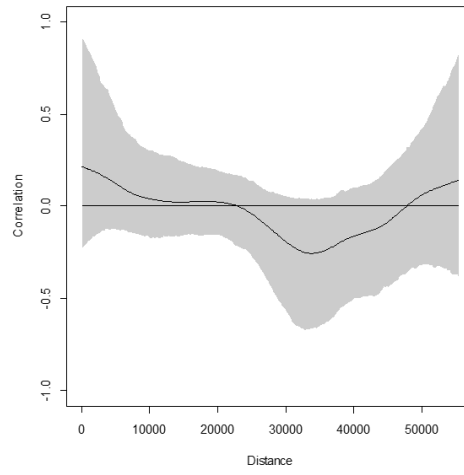

c) Domestic bees

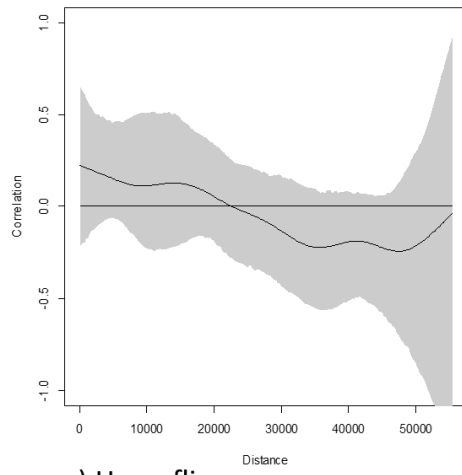

d) Bumblebees

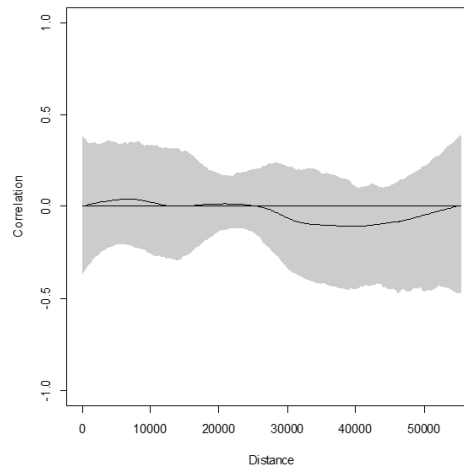

e) Hoverflies

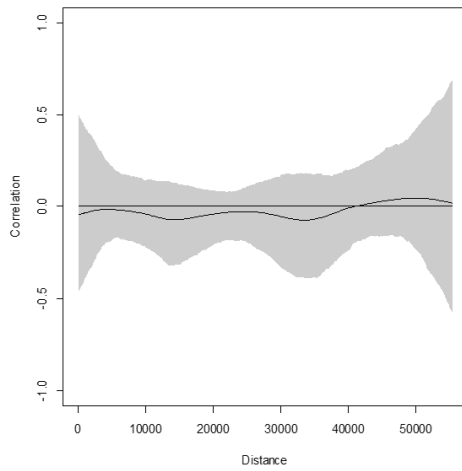

Supplement: MOESM1 [file 10980_2023_1643_MOESM1_ESM.pdf]
