# Supplementary material for: Floral resource maps: a tool to explain flower-visiting insect abundance at multiple spatial scales
Source: Springer Nature journal article supplement (doi:10.1007/s10980-023-01643-9), 2023-03-28
Supplement: MOESM2 [file 10980_2023_1643_MOESM2_ESM.xlsx]

## Sheet: Feuil1
Appendix G Spearman correlation coefficients between Community Weighted Mean (CWM) values of each floral trait, at the landscape scale (i.e. 250, 500 and 1000 m). Bold values indicate Spearman rho coefficients > |0.7|
	1000_Mean UV reflection	500_Mean UV reflection	250_Mean UV reflection	1000_Min size of floral unit	1000_Max size of floral unit	500_Min size of floral unit	500_Max size of floral unit	250_Min size of floral unit	250_Max size of floral unit	1000_Plant height [intermediate]	1000_Plant height [short]	1000_Plant height [tall]	500_Plant height [intermediate]	500_Plant height [short]	500_Plant height [tall]	250_Plant height [intermediate]	250_Plant height [short]	250_Plant height [tall]	1000_Flowering duration	500_Flowering duration	250_Flowering duration	1000_Flower symmetry [Actino]	1000_Flower symmetry [Zygo]	500_Flower symmetry [Actino]	500_Flower symmetry [Zygo]	250_Flower symmetry [Actino]	250_Flower symmetry [Zygo]	1000_Empiric nectar productivity	500_Empiric nectar productivity	250_Empiric nectar productivity	250_Flower morphology [catkin]	250_Flower morphology [flat]	250_Flower morphology [tube]	500_Flower morphology [catkin]	500_Flower morphology [flat]	500_Flower morphology [tube]	1000_Flower morphology [catkin]	1000_Flower morphology [flat]	1000_Flower morphology [tube]
1000_Mean UV reflection	1	0.61	0.27	0.40	0.39	0.41	0.38	0.24	0.24	0.37	0.39	-0.07	0.51	0.17	-0.04	0.24	0.20	0.00	0.35	0.15	0.20	0.47	0.18	0.26	0.15	0.18	0.13	-0.14	0.23	0.20	-0.08	0.20	0.15	-0.09	0.23	0.16	-0.07	0.55	0.06
500_Mean UV reflection	0.61	1	0.71	0.46	0.46	0.68	0.67	0.56	0.56	0.34	0.35	0.11	0.66	0.46	0.09	0.54	0.58	0.04	0.34	0.44	0.54	0.46	0.24	0.56	0.36	0.55	0.39	0.14	0.41	0.39	-0.03	0.59	0.36	-0.02	0.57	0.31	0.11	0.52	0.15
250_Mean UV reflection	0.27	0.71	1	0.36	0.38	0.51	0.51	0.70	0.72	0.24	0.10	0.28	0.47	0.34	0.21	0.72	0.74	0.12	0.09	0.31	0.70	0.28	-0.03	0.44	0.23	0.79	0.53	0.17	0.44	0.43	0.00	0.84	0.45	0.11	0.48	0.18	0.27	0.29	-0.06
1000_Min size of floral unit	0.40	0.46	0.36	1	1	0.75	0.76	0.63	0.63	0.71	0.05	0.69	0.58	0.16	0.54	0.44	0.41	0.39	0.10	0.21	0.43	0.38	0.12	0.47	0.18	0.51	0.24	0.80	0.64	0.58	0.42	0.48	0.29	0.51	0.41	0.23	0.66	0.28	0.10
1000_Max size of floral unit	0.39	0.46	0.38	1	1	0.74	0.75	0.63	0.64	0.69	0.06	0.70	0.56	0.18	0.54	0.44	0.44	0.38	0.11	0.23	0.45	0.40	0.12	0.49	0.20	0.53	0.27	0.80	0.63	0.59	0.40	0.50	0.31	0.51	0.43	0.24	0.67	0.31	0.09
500_Min size of floral unit	0.41	0.68	0.51	0.75	0.74	1	1	0.82	0.81	0.51	0.15	0.35	0.70	0.36	0.48	0.59	0.55	0.34	0.18	0.42	0.54	0.41	0.19	0.69	0.32	0.63	0.28	0.55	0.86	0.77	0.39	0.60	0.33	0.45	0.62	0.34	0.32	0.33	0.16
500_Max size of floral unit	0.38	0.67	0.51	0.76	0.75	1	1	0.83	0.82	0.51	0.13	0.37	0.68	0.37	0.50	0.58	0.56	0.35	0.17	0.43	0.55	0.41	0.19	0.70	0.33	0.65	0.29	0.58	0.86	0.77	0.41	0.62	0.34	0.47	0.64	0.35	0.35	0.32	0.16
250_Min size of floral unit	0.24	0.56	0.70	0.63	0.63	0.82	0.83	1	1	0.36	0.09	0.38	0.58	0.36	0.43	0.81	0.66	0.31	0.10	0.40	0.68	0.34	0.06	0.61	0.35	0.80	0.46	0.46	0.78	0.90	0.34	0.74	0.49	0.37	0.57	0.35	0.37	0.26	0.06
250_Max size of floral unit	0.24	0.56	0.72	0.63	0.64	0.81	0.82	1	1	0.36	0.08	0.40	0.56	0.37	0.42	0.81	0.67	0.32	0.10	0.41	0.69	0.34	0.05	0.61	0.35	0.81	0.47	0.47	0.78	0.89	0.34	0.76	0.49	0.37	0.58	0.35	0.38	0.27	0.05
1000_Plant height [intermediate]	0.37	0.34	0.24	0.71	0.69	0.51	0.51	0.36	0.36	1	-0.37	0.70	0.76	-0.33	0.67	0.47	-0.02	0.52	-0.35	-0.26	-0.02	-0.15	-0.22	0.00	-0.17	0.10	-0.09	0.49	0.41	0.20	0.53	0.14	-0.05	0.62	-0.05	-0.09	0.62	-0.19	-0.24
1000_Plant height [short]	0.39	0.35	0.10	0.05	0.06	0.15	0.13	0.09	0.08	-0.37	1	-0.52	-0.15	0.72	-0.55	-0.11	0.43	-0.53	0.99	0.68	0.44	0.89	0.86	0.54	0.66	0.27	0.42	-0.06	0.10	0.21	-0.53	0.19	0.43	-0.55	0.53	0.64	-0.50	0.92	0.80
1000_Plant height [tall]	-0.07	0.11	0.28	0.69	0.70	0.35	0.37	0.38	0.40	0.70	-0.52	1	0.39	-0.25	0.74	0.39	0.13	0.59	-0.48	-0.20	0.13	-0.19	-0.41	0.05	-0.18	0.27	0.06	0.72	0.36	0.25	0.56	0.31	0.05	0.71	0.03	-0.17	0.97	-0.27	-0.40
500_Plant height [intermediate]	0.51	0.66	0.47	0.58	0.56	0.70	0.68	0.58	0.56	0.76	-0.15	0.39	1	-0.15	0.45	0.70	0.15	0.35	-0.13	-0.09	0.17	0.03	-0.06	0.12	0.02	0.26	0.08	0.27	0.57	0.42	0.36	0.27	0.11	0.36	0.07	0.07	0.32	0.03	-0.12
500_Plant height [short]	0.17	0.46	0.34	0.16	0.18	0.36	0.37	0.36	0.37	-0.33	0.72	-0.25	-0.15	1	-0.30	0.03	0.74	-0.36	0.73	0.98	0.72	0.76	0.60	0.89	0.82	0.62	0.58	0.16	0.31	0.44	-0.36	0.57	0.55	-0.30	0.90	0.74	-0.23	0.73	0.58
500_Plant height [tall]	-0.04	0.09	0.21	0.54	0.54	0.48	0.50	0.43	0.42	0.67	-0.55	0.74	0.45	-0.30	1	0.42	0.03	0.83	-0.53	-0.25	0.02	-0.29	-0.43	0.08	-0.28	0.20	-0.07	0.52	0.49	0.32	0.83	0.24	-0.04	0.96	0.04	-0.25	0.73	-0.38	-0.40
250_Plant height [intermediate]	0.24	0.54	0.72	0.44	0.44	0.59	0.58	0.81	0.81	0.47	-0.11	0.39	0.70	0.03	0.42	1	0.35	0.32	-0.11	0.06	0.38	0.06	-0.14	0.23	0.14	0.49	0.34	0.22	0.51	0.61	0.32	0.48	0.35	0.32	0.23	0.16	0.37	0.04	-0.16
250_Plant height [short]	0.20	0.58	0.74	0.41	0.44	0.55	0.56	0.66	0.67	-0.02	0.43	0.13	0.15	0.74	0.03	0.35	1	-0.16	0.45	0.72	0.99	0.62	0.35	0.79	0.59	0.95	0.79	0.35	0.53	0.60	-0.19	0.93	0.74	0.00	0.81	0.53	0.14	0.57	0.35
250_Plant height [tall]	0.00	0.04	0.12	0.39	0.38	0.34	0.35	0.31	0.32	0.52	-0.53	0.59	0.35	-0.36	0.83	0.32	-0.16	1	-0.52	-0.34	-0.19	-0.30	-0.49	-0.05	-0.38	0.04	-0.33	0.34	0.35	0.16	0.92	0.09	-0.31	0.80	-0.07	-0.40	0.63	-0.35	-0.48
1000_Flowering duration	0.35	0.34	0.09	0.10	0.11	0.18	0.17	0.10	0.10	-0.35	0.99	-0.48	-0.13	0.73	-0.53	-0.11	0.45	-0.52	1	0.71	0.47	0.90	0.90	0.57	0.70	0.30	0.44	0.02	0.15	0.23	-0.52	0.20	0.46	-0.52	0.56	0.68	-0.46	0.92	0.84
500_Flowering duration	0.15	0.44	0.31	0.21	0.23	0.42	0.43	0.40	0.41	-0.26	0.68	-0.20	-0.09	0.98	-0.25	0.06	0.72	-0.34	0.71	1	0.71	0.73	0.62	0.91	0.87	0.60	0.59	0.24	0.39	0.49	-0.31	0.56	0.57	-0.24	0.90	0.81	-0.20	0.69	0.61
250_Flowering duration	0.20	0.54	0.70	0.43	0.45	0.54	0.55	0.68	0.69	-0.02	0.44	0.13	0.17	0.72	0.02	0.38	0.99	-0.19	0.47	0.71	1	0.64	0.38	0.78	0.62	0.94	0.85	0.35	0.54	0.65	-0.21	0.90	0.82	0.00	0.79	0.58	0.13	0.58	0.38
1000_Flower symmetry [Actino]	0.47	0.46	0.28	0.38	0.40	0.41	0.41	0.34	0.34	-0.15	0.89	-0.19	0.03	0.76	-0.29	0.06	0.62	-0.30	0.90	0.73	0.64	1	0.75	0.72	0.64	0.53	0.50	0.24	0.37	0.44	-0.32	0.45	0.52	-0.29	0.72	0.62	-0.16	0.97	0.68
1000_Flower symmetry [Zygo]	0.18	0.24	-0.03	0.12	0.12	0.19	0.19	0.06	0.05	-0.22	0.86	-0.41	-0.06	0.60	-0.43	-0.14	0.35	-0.49	0.90	0.62	0.38	0.75	1	0.48	0.69	0.20	0.36	0.16	0.17	0.20	-0.45	0.11	0.40	-0.41	0.45	0.71	-0.44	0.73	0.98
500_Flower symmetry [Actino]	0.26	0.56	0.44	0.47	0.49	0.69	0.70	0.61	0.61	0.00	0.54	0.05	0.12	0.89	0.08	0.23	0.79	-0.05	0.57	0.91	0.78	0.72	0.48	1	0.71	0.75	0.55	0.43	0.60	0.65	-0.01	0.71	0.55	0.08	0.99	0.66	0.06	0.65	0.45
500_Flower symmetry [Zygo]	0.15	0.36	0.23	0.18	0.20	0.32	0.33	0.35	0.35	-0.17	0.66	-0.18	0.02	0.82	-0.28	0.14	0.59	-0.38	0.70	0.87	0.62	0.64	0.69	0.71	1	0.46	0.65	0.22	0.37	0.41	-0.35	0.41	0.66	-0.28	0.7	0.98	-0.18	0.62	0.68
250_Flower symmetry [Actino]	0.18	0.55	0.79	0.51	0.53	0.63	0.65	0.80	0.81	0.10	0.27	0.27	0.26	0.62	0.20	0.49	0.95	0.04	0.30	0.6	0.94	0.53	0.2	0.75	0.46	1	0.66	0.43	0.61	0.70	0.02	0.98	0.63	0.17	0.76	0.41	0.28	0.46	0.20
250_Flower symmetry [Zygo]	0.13	0.39	0.53	0.24	0.27	0.28	0.29	0.46	0.47	-0.09	0.42	0.06	0.08	0.58	-0.07	0.34	0.79	-0.33	0.44	0.59	0.85	0.5	0.36	0.55	0.65	0.66	1	0.17	0.31	0.47	-0.36	0.62	0.98	-0.10	0.57	0.62	0.08	0.48	0.37
1000_Empiric nectar productivity	-0.14	0.14	0.17	0.80	0.80	0.55	0.58	0.46	0.47	0.49	-0.06	0.72	0.27	0.16	0.52	0.22	0.35	0.34	0.02	0.24	0.35	0.24	0.16	0.43	0.22	0.43	0.17	1	0.58	0.47	0.42	0.40	0.20	0.53	0.38	0.26	0.68	0.08	0.19
500_Empiric nectar productivity	0.23	0.41	0.44	0.64	0.63	0.86	0.86	0.78	0.78	0.41	0.10	0.36	0.57	0.31	0.49	0.51	0.53	0.35	0.15	0.39	0.54	0.37	0.17	0.6	0.37	0.61	0.31	0.58	1	0.8	0.38	0.57	0.35	0.49	0.53	0.40	0.30	0.26	0.17
250_Empiric nectar productivity	0.20	0.39	0.43	0.58	0.59	0.77	0.77	0.90	0.89	0.20	0.21	0.25	0.42	0.44	0.32	0.61	0.60	0.16	0.23	0.49	0.65	0.44	0.20	0.65	0.41	0.7	0.47	0.47	0.8	1	0.24	0.59	0.54	0.29	0.59	0.44	0.23	0.33	0.21
250_Flower morphology [catkin]	-0.08	-0.03	0.00	0.42	0.40	0.39	0.41	0.34	0.34	0.53	-0.53	0.56	0.36	-0.36	0.83	0.32	-0.19	0.92	-0.52	-0.31	-0.21	-0.32	-0.45	-0.01	-0.35	0.02	-0.36	0.42	0.38	0.24	1	0.03	-0.30	0.82	-0.05	-0.33	0.57	-0.41	-0.42
250_Flower morphology [flat]	0.20	0.59	0.84	0.48	0.50	0.60	0.62	0.74	0.76	0.14	0.19	0.31	0.27	0.57	0.24	0.48	0.93	0.09	0.20	0.56	0.90	0.45	0.11	0.71	0.41	0.98	0.62	0.40	0.57	0.59	0.03	1	0.56	0.19	0.74	0.35	0.33	0.40	0.10
250_Flower morphology [tube]	0.15	0.36	0.45	0.29	0.31	0.33	0.34	0.49	0.49	-0.05	0.43	0.05	0.11	0.55	-0.04	0.35	0.74	-0.31	0.46	0.57	0.82	0.52	0.40	0.55	0.66	0.63	0.98	0.20	0.35	0.54	-0.30	0.56	1	-0.06	0.56	0.65	0.07	0.48	0.42
500_Flower morphology [catkin]	-0.09	-0.02	0.11	0.51	0.51	0.45	0.47	0.37	0.37	0.62	-0.55	0.71	0.36	-0.30	0.96	0.32	0.00	0.80	-0.52	-0.24	0.00	-0.29	-0.41	0.08	-0.28	0.17	-0.10	0.53	0.49	0.29	0.82	0.19	-0.06	1	0.05	-0.26	0.68	-0.40	-0.37
500_Flower morphology [flat]	0.23	0.57	0.48	0.41	0.43	0.62	0.64	0.57	0.58	-0.05	0.53	0.03	0.07	0.90	0.04	0.23	0.81	-0.07	0.56	0.90	0.79	0.72	0.45	0.99	0.70	0.76	0.57	0.38	0.53	0.59	-0.05	0.74	0.56	0.05	1	0.63	0.06	0.65	0.42
500_Flower morphology [tube]	0.16	0.31	0.18	0.23	0.24	0.34	0.35	0.35	0.35	-0.09	0.64	-0.17	0.07	0.74	-0.25	0.16	0.53	-0.40	0.68	0.81	0.58	0.62	0.71	0.66	0.98	0.41	0.62	0.26	0.40	0.44	-0.33	0.35	0.65	-0.26	0.63	1	-0.18	0.58	0.71
1000_Flower morphology [catkin]	-0.07	0.11	0.27	0.66	0.67	0.32	0.35	0.37	0.38	0.62	-0.50	0.97	0.32	-0.23	0.73	0.37	0.14	0.63	-0.46	-0.20	0.13	-0.16	-0.44	0.06	-0.18	0.28	0.08	0.68	0.30	0.23	0.57	0.33	0.07	0.68	0.06	-0.18	1	-0.24	-0.43
1000_Flower morphology [flat]	0.55	0.52	0.29	0.28	0.31	0.33	0.32	0.26	0.27	-0.19	0.92	-0.27	0.03	0.73	-0.38	0.04	0.57	-0.35	0.92	0.69	0.58	0.97	0.73	0.65	0.62	0.46	0.48	0.08	0.26	0.33	-0.41	0.40	0.48	-0.40	0.65	0.58	-0.24	1	0.65
1000_Flower morphology [tube]	0.06	0.15	-0.06	0.10	0.09	0.16	0.16	0.06	0.05	-0.24	0.80	-0.40	-0.12	0.58	-0.40	-0.16	0.35	-0.48	0.84	0.61	0.38	0.68	0.98	0.45	0.68	0.20	0.37	0.19	0.17	0.21	-0.42	0.10	0.42	-0.37	0.42	0.71	-0.43	0.65	1
